# Supplementary material for: Highly efficient and durable P, Ru–CeO2 self-supporting electrodes toward industrial-level hydrogen production
Source: Royal Society of Chemistry journal article supplement (doi:10.1039/d4ce00143e), 2024-01-01
Supplement: d4ce00143e1.pdf [file d4ce00143e1.pdf]

## Supporting Information

### **Highly Efficient and Durable P, Ru-CeO<sub>2</sub> Self-supporting Electrodes Toward Industrial-level Hydrogen Production**

Wenguang Ma, Xiaodong Yang, Yanru Xu, Cuncheng Li\*, Yiqiang Sun\*, Qi Shen\*,  
Zhixin Sun\*

Dr. W. G. Ma, Dr. X. D. Yang, Dr. Y. R. Xu, Prof. C. C. Li, Prof. Y. Q. Sun, Prof. Q.  
Shen

School of Chemistry and Chemical Engineering, University of Jinan, Jinan, 250055, P.  
R. China

Dr. Z. X. Sun

Shandong University of Traditional Chinese Medicine

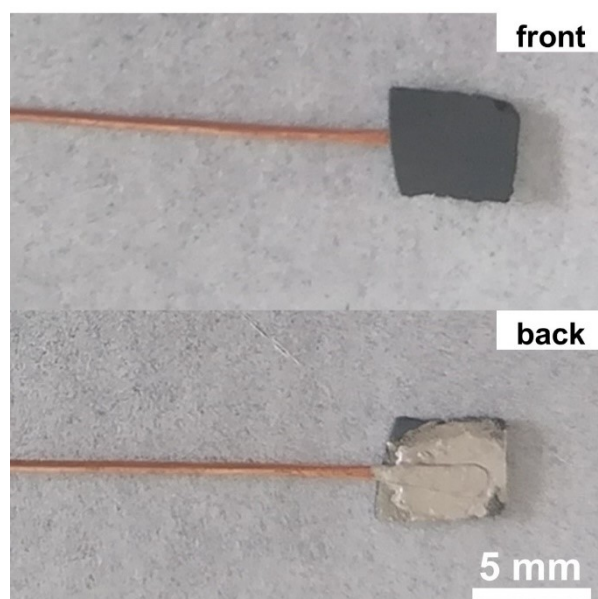

**Figure S1.** The optical photo of the P, Ru-CeO<sub>2</sub> self-supporting electrode.

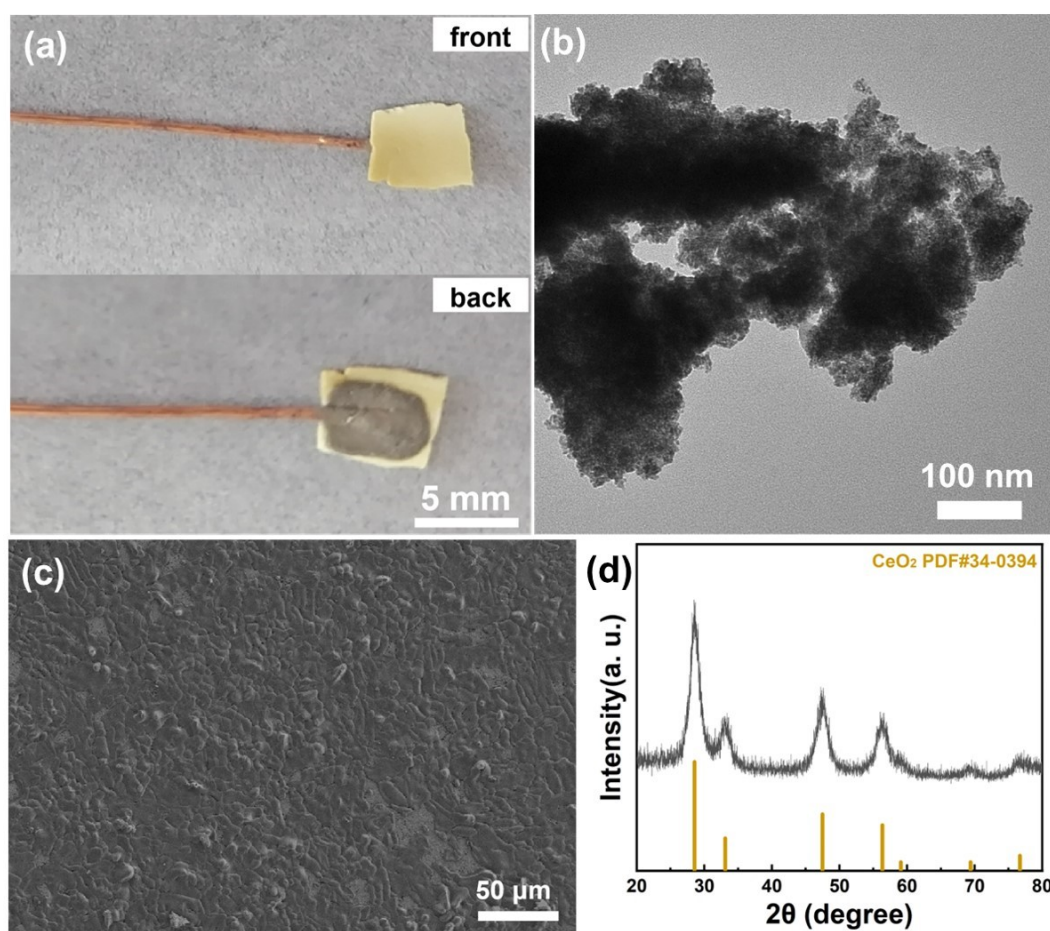

**Figure S2.** (a) Optical photo, (b) TEM image, (c) TEM image and (d) XRD pattern of the pristine CeO<sub>2</sub> self-supporting electrode.

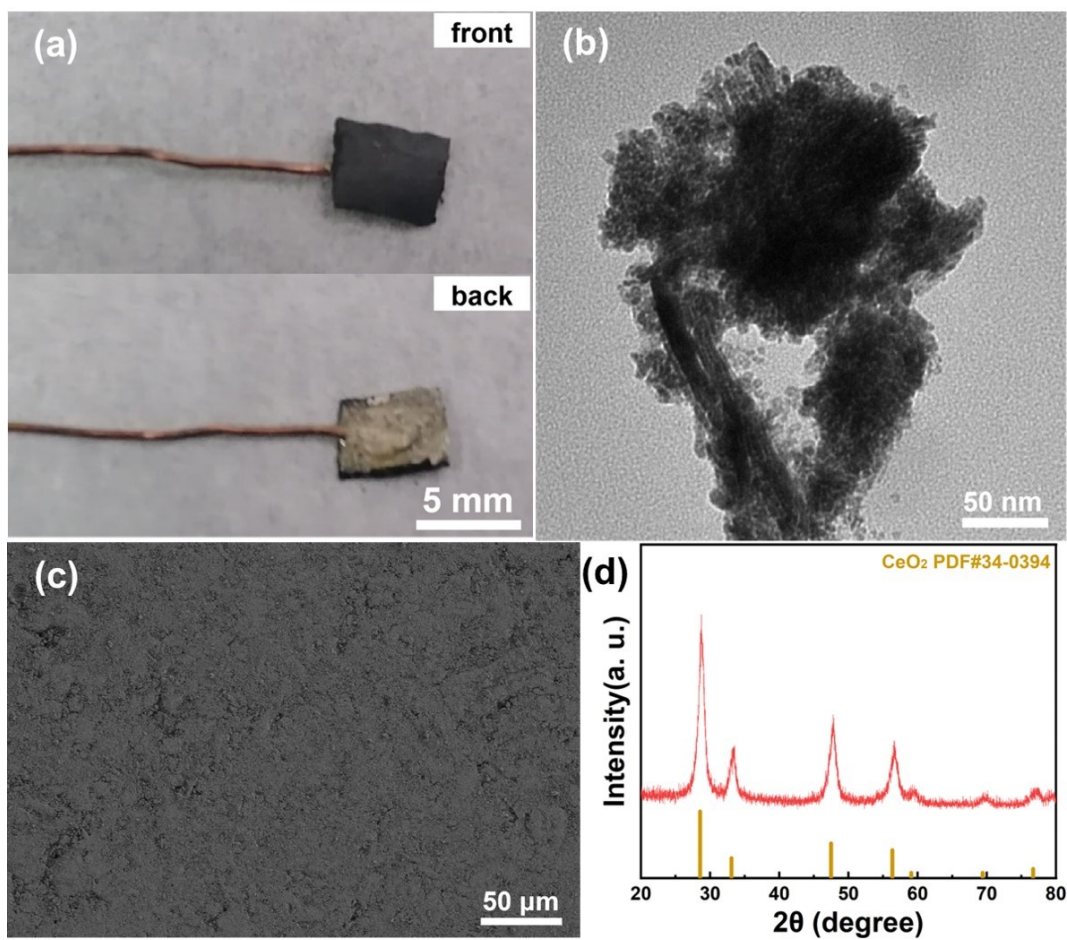

**Figure S3.** (a) Optical photo, (b) TEM image, (c) TEM image and (d) XRD pattern of the Ru-CeO<sub>2</sub> self-supporting electrode.

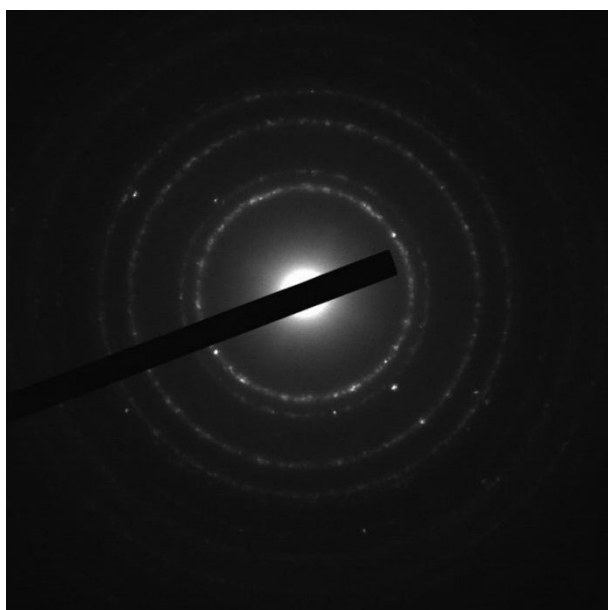

**Figure S4.** SAED pattern of the P, Ru-CeO<sub>2</sub> catalyst.

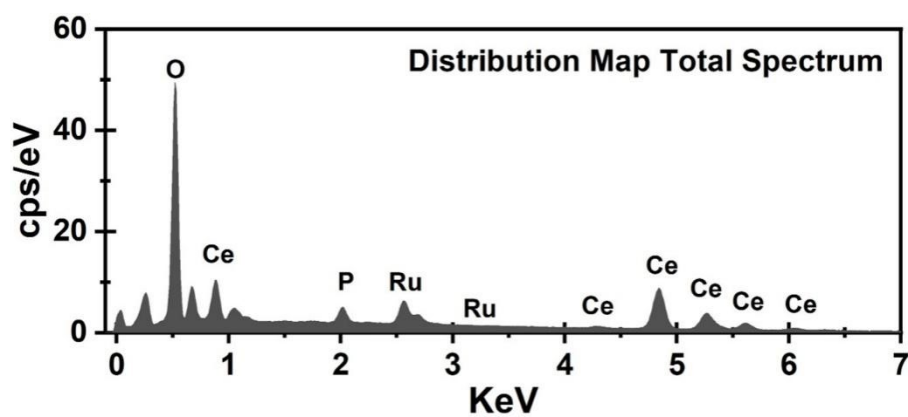

**Figure S5.** EDX spectrum of the P, Ru-CeO<sub>2</sub> self-supporting electrode.

| Distribution Map Total Spectrum |           |         |           |         |
|---------------------------------|-----------|---------|-----------|---------|
| element                         | Line Type | Weight% | wt% Sigma | Atomic% |
| O                               | K         | 17.03   | 0.10      | 54.05   |
| P                               | K         | 1.48    | 0.03      | 2.49    |
| Ru                              | L         | 6.66    | 0.10      | 3.43    |
| Ce                              | M         | 71.57   | 0.18      | 26.62   |
| Other                           | -         | 3.26    | -         | 13.41   |
| <b>total</b>                    | —         | 100     | —         | 100     |

**Table S1.** Relative proportions of main elements, corresponding to Figure S5.

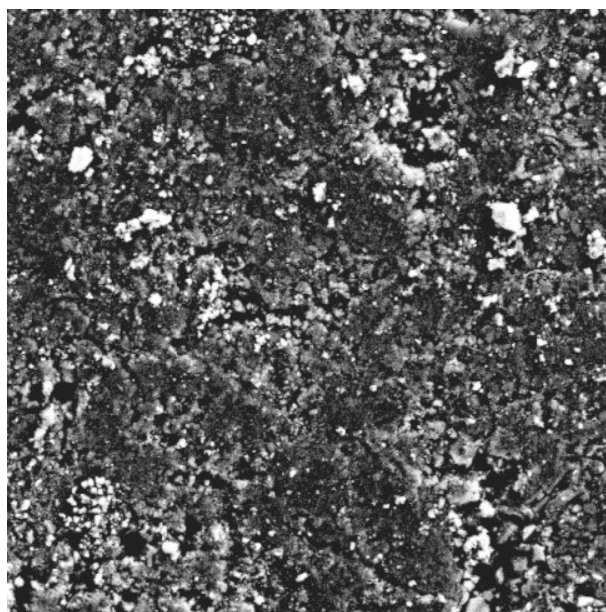

**Figure S6.** The SEM image for elemental mapping of the P, Ru-CeO<sub>2</sub> self-supporting electrode.



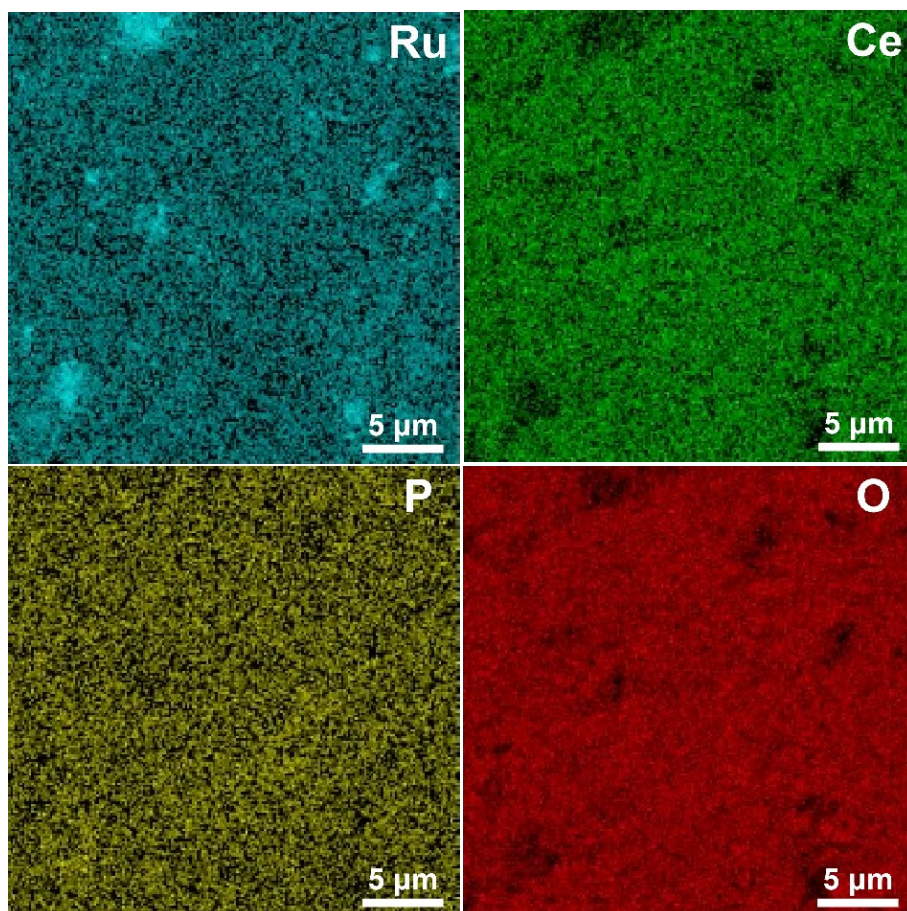

**Figure S7.** The corresponding elemental mapping image in Figure S5 of the P, Ru-CeO<sub>2</sub> self-supporting electrode.

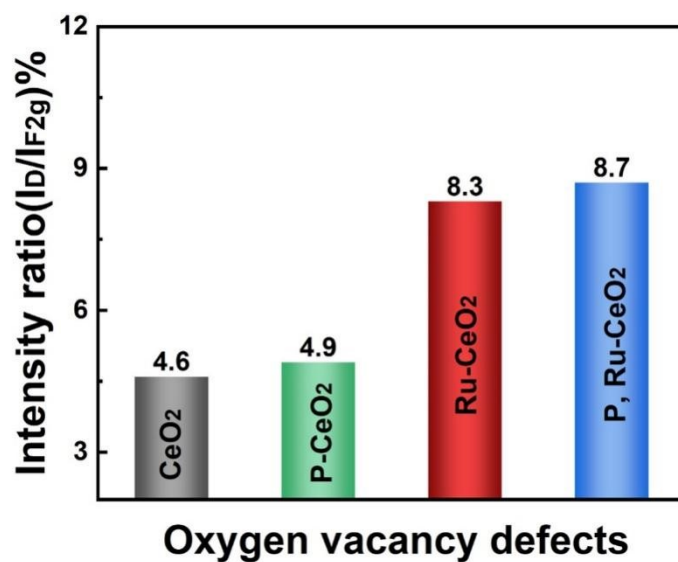

**Figure S8.** Peak intensity ratio of I<sub>D</sub>/I<sub>F2g</sub> over CeO<sub>2</sub>, P-CeO<sub>2</sub>, Ru-CeO<sub>2</sub> and P, Ru-CeO<sub>2</sub> catalysts.

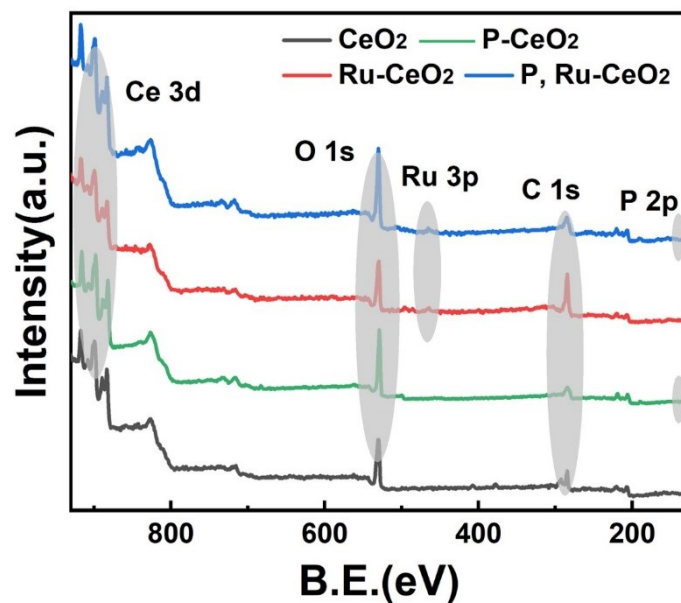

**Figure S9.** XPS survey scan spectrum of the pristine CeO<sub>2</sub>, P-CeO<sub>2</sub>, Ru-CeO<sub>2</sub> and P, Ru-CeO<sub>2</sub> catalysts.

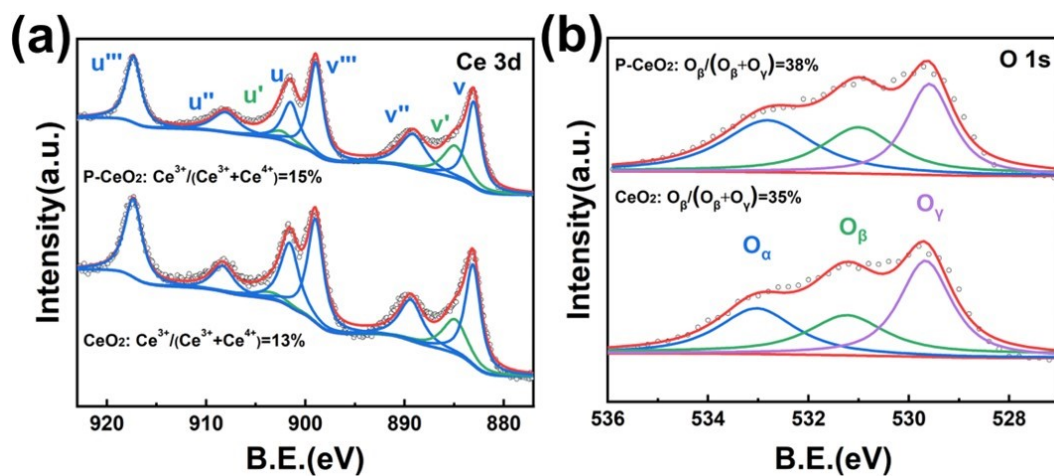

**Figure S10.** XPS of the pristine CeO<sub>2</sub>, P-CeO<sub>2</sub> catalysts: (a) Ce 3d orbitals, (b) O 1s orbitals.

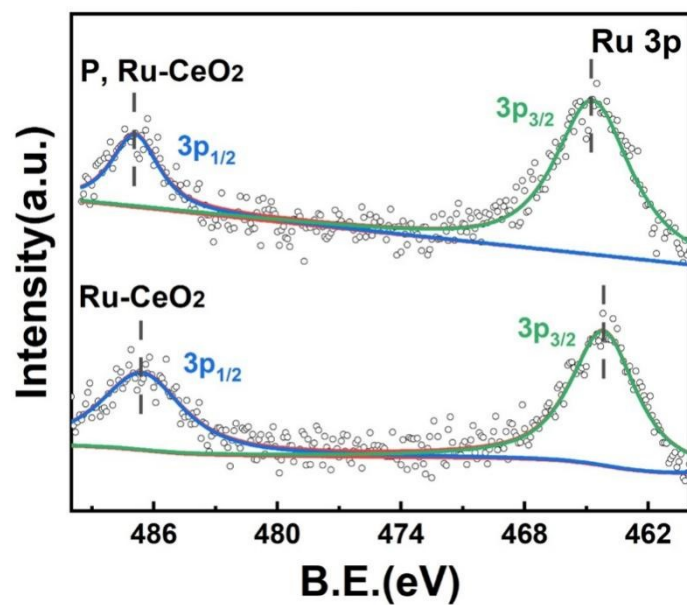

Figure S11. XPS of Ru-CeO<sub>2</sub> and P, Ru-CeO<sub>2</sub> catalysts: Ru 3p orbitals.

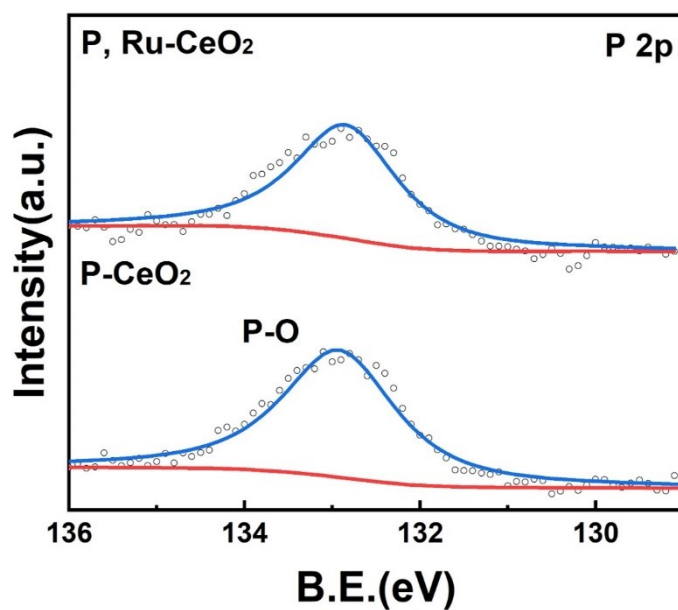

Figure S12. XPS of P-CeO<sub>2</sub> and P, Ru-CeO<sub>2</sub> catalysts: P 2p orbitals.

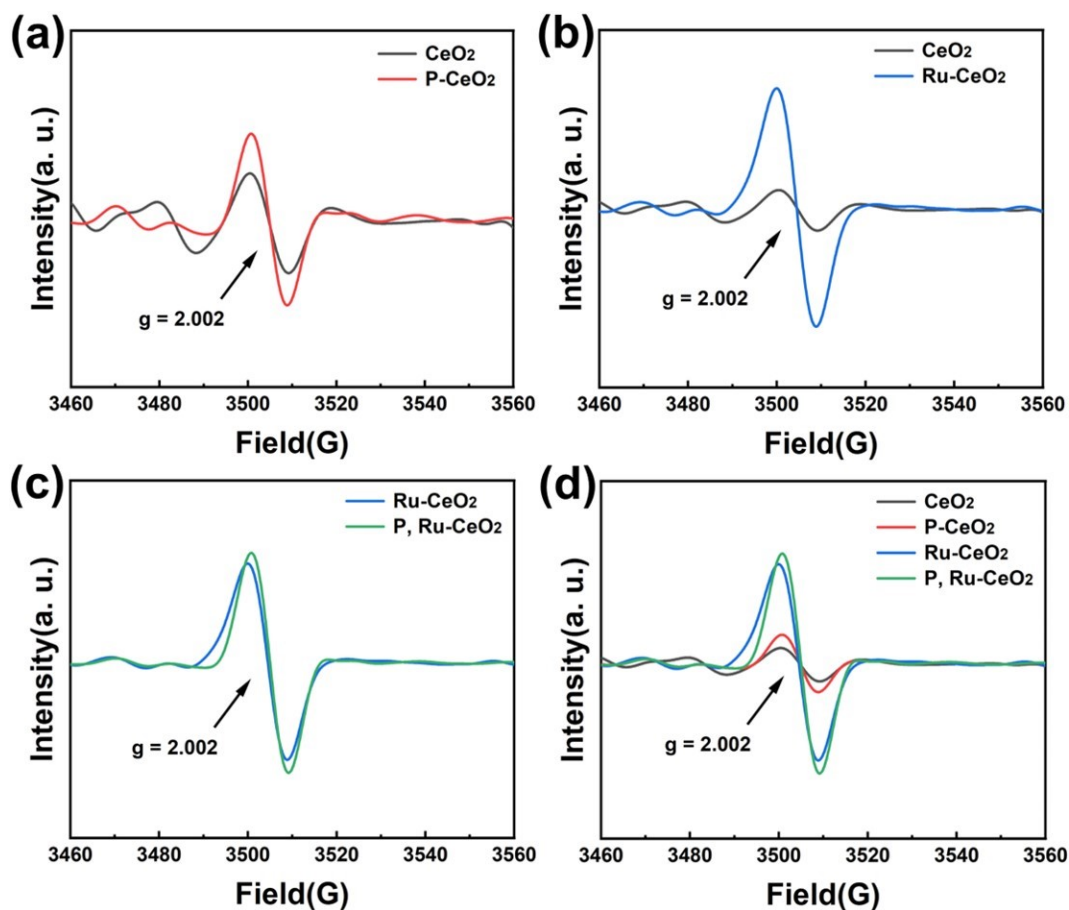

**Figure S13.** EPR spectrum of the catalysts: (a)  $\text{CeO}_2$  and P- $\text{CeO}_2$ , (b)  $\text{CeO}_2$  and Ru- $\text{CeO}_2$ , (c) Ru- $\text{CeO}_2$  and P, Ru- $\text{CeO}_2$ , (d)  $\text{CeO}_2$ , P- $\text{CeO}_2$ , Ru- $\text{CeO}_2$  and P, Ru- $\text{CeO}_2$ .

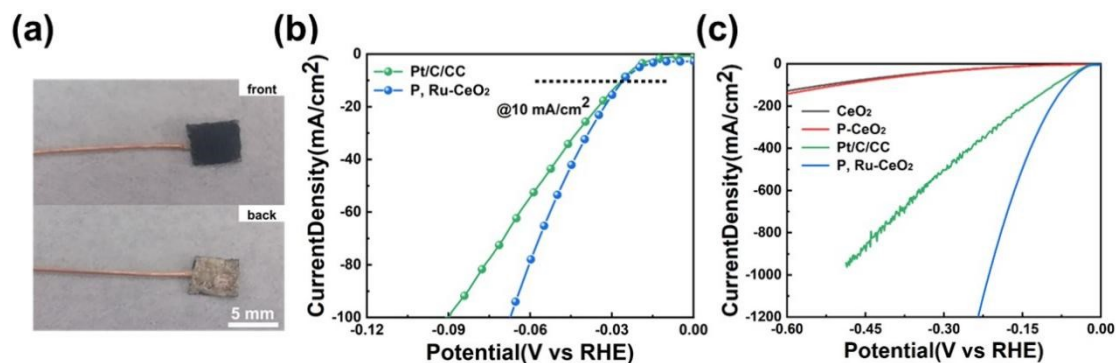

**Figure S14.** (a) Commercial Pt/C working electrode loaded on CC. iR-corrected polarization curves of the pure  $\text{CeO}_2$ , P- $\text{CeO}_2$ , P, Ru- $\text{CeO}_2$  self-supporting working electrodes and commercial Pt/C/CC: (b) @low-current density; (c) @high-current density.



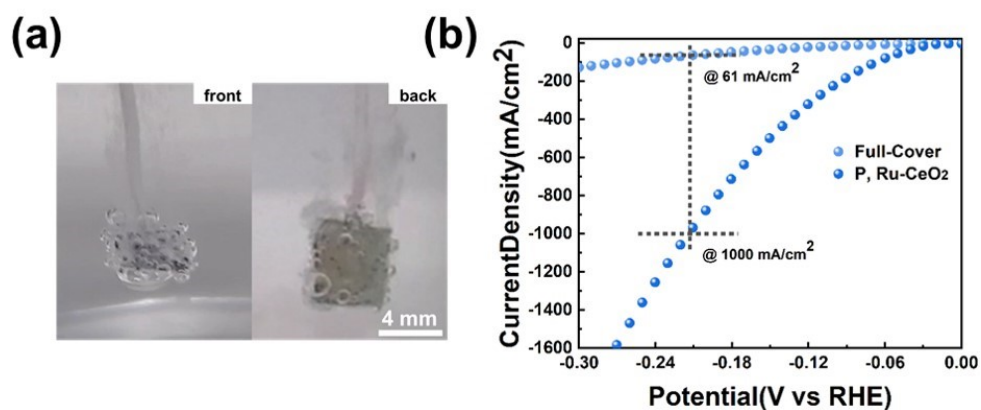

**Figure S15.** (a) the comparison between the front and back of the P, Ru-CeO<sub>2</sub> self-supporting working electrode. (b) iR-corrected polarization curves of the Full-Cover-P, Ru-CeO<sub>2</sub>, P, Ru-CeO<sub>2</sub> self-supporting working electrodes.

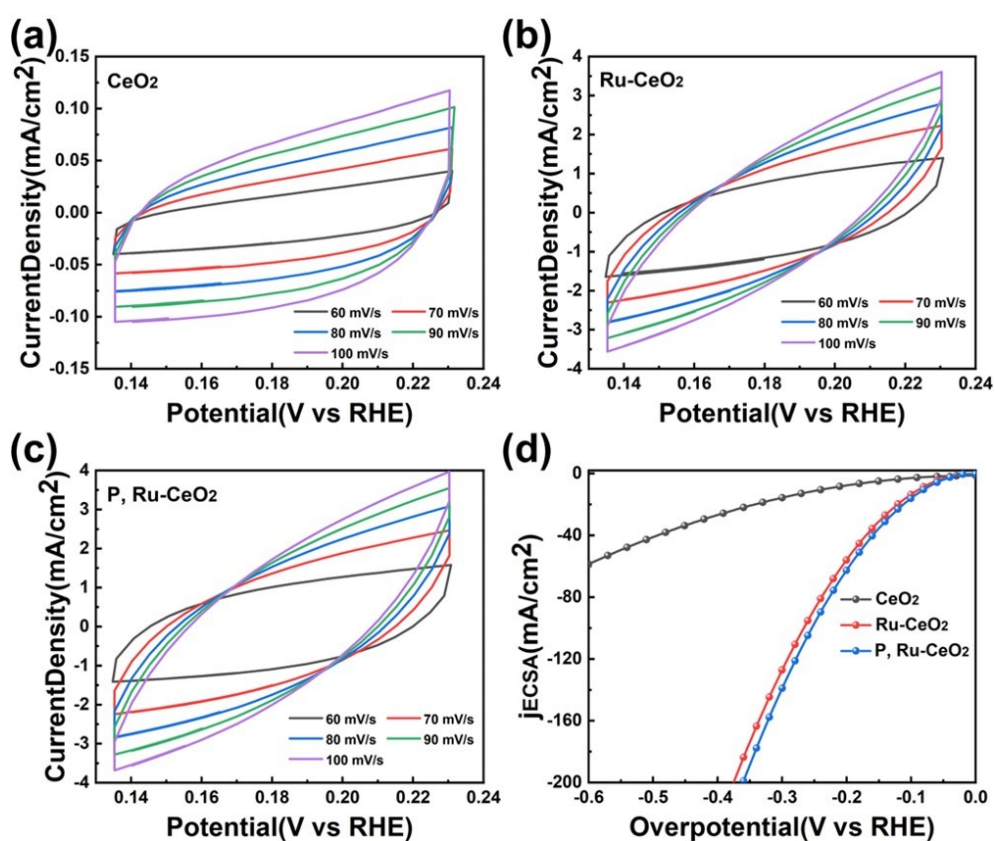

**Figure S16.** Electrochemical double-layer capacitance measurements at different scan rates for HER. Cyclic voltammograms of (a) pure CeO<sub>2</sub>, (b) Ru-CeO<sub>2</sub> and (c) P, Ru-CeO<sub>2</sub> self-supporting working electrodes. (d) HER polarization curves normalized by the electrochemical double-layer capacitance.

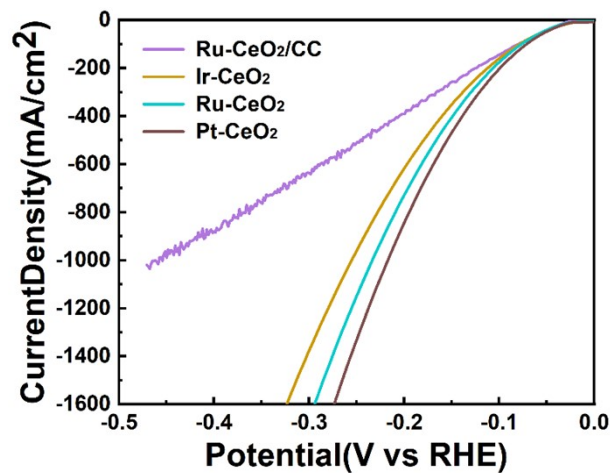

**Figure S17.** iR-corrected polarization curves of the Ir-CeO<sub>2</sub>, Ru-CeO<sub>2</sub>, Pt-CeO<sub>2</sub> self-supporting working electrodes, and the Ru-CeO<sub>2</sub>/CC.

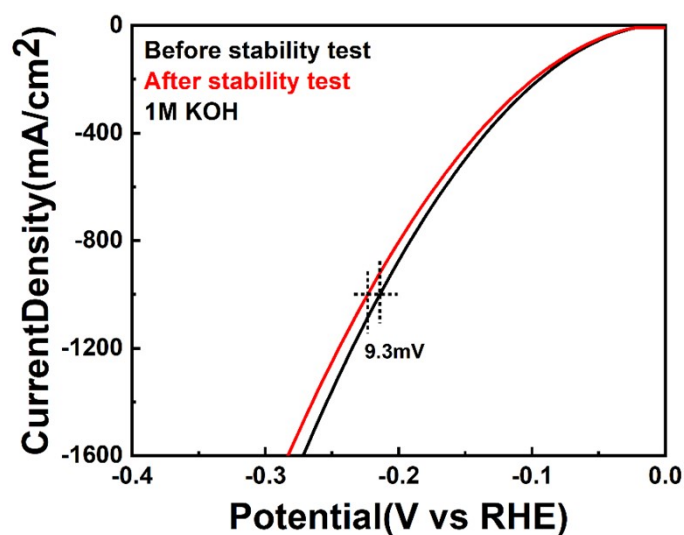

**Figure S18.** iR-corrected polarization curves of the Pt, Ru-CeO<sub>2</sub> self-supporting electrode before and after 5000 CV cycles in 1 M KOH.

| materials                                    | $\eta_{\text{HER}}(\text{mV})$ | Tafel(mV/dec) | Reference            |
|----------------------------------------------|--------------------------------|---------------|----------------------|
| This work                                    | 215                            | 25            | —                    |
| Pt/TiO <sub>2</sub> /Ni(OH) <sub>2</sub> /NF | 227                            | 39            | Ref.1 <sup>1</sup>   |
| NiCo@RuO <sub>2</sub> HNAs/NF                | 236                            | 69            | Ref.2 <sup>2</sup>   |
| FeNiZn/FeNi <sub>3</sub> @NiFe               | 245                            | 45            | Ref.3 <sup>3</sup>   |
| Ru-CoO <sub>x</sub> /NF                      | 252                            | 28            | Ref.4 <sup>4</sup>   |
| Ni-W <sub>2</sub> N@NF                       | 276                            | 46            | Ref.5 <sup>5</sup>   |
| Sr <sub>2</sub> RuO <sub>4</sub> bulk SC     | 278                            | 26            | Ref.6 <sup>6</sup>   |
| Co-SA/CC                                     | 294                            | 97            | Ref.7 <sup>7</sup>   |
| Ni-Co-P/CFP                                  | 295                            | 31            | Ref.8 <sup>8</sup>   |
| Self-Standing Pt NC/CF                       | 331                            | 61            | Ref.9 <sup>9</sup>   |
| Cu <sub>3</sub> P-FeP@CC                     | 338                            | 84            | Ref.10 <sup>10</sup> |

**Table S2.** Comparison of the HER performance of the P, Ru-CeO<sub>2</sub> self-supporting working electrode with the similar catalysts at 1000 mA·cm<sup>-2</sup> in 1.0 M KOH.

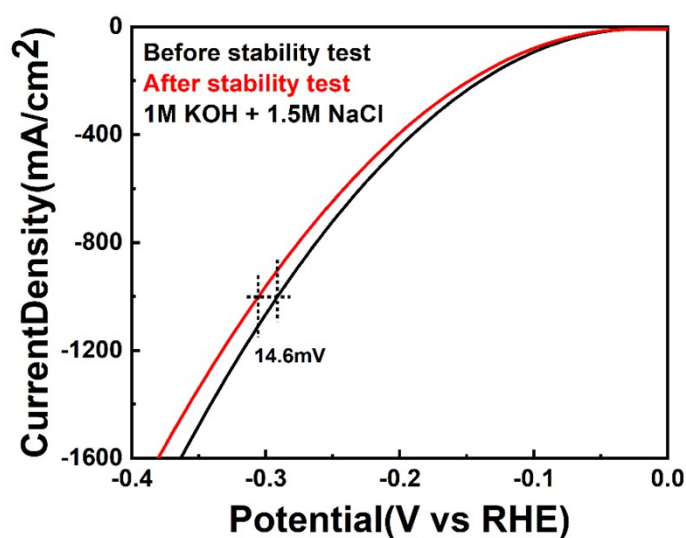

**Figure S19.** iR-corrected polarization curves of the P, Ru-CeO<sub>2</sub> self-supporting electrode before and after 5000 CV cycles in 1 M KOH+1.5 M NaCl.

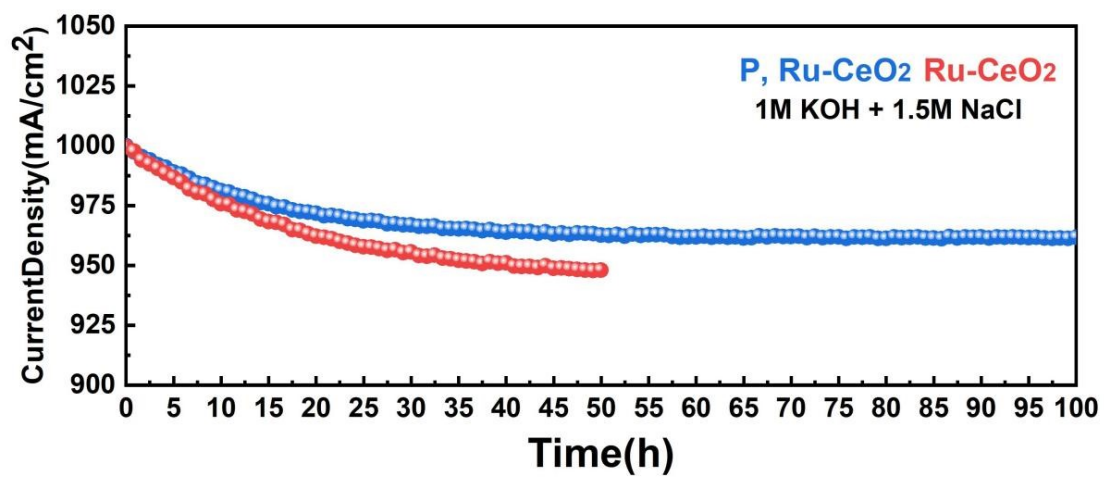

**Figure S20.** Chronoamperometric curves of the Ru-CeO<sub>2</sub> self-supporting electrodes and the P, Ru-CeO<sub>2</sub> self-supporting electrodes.

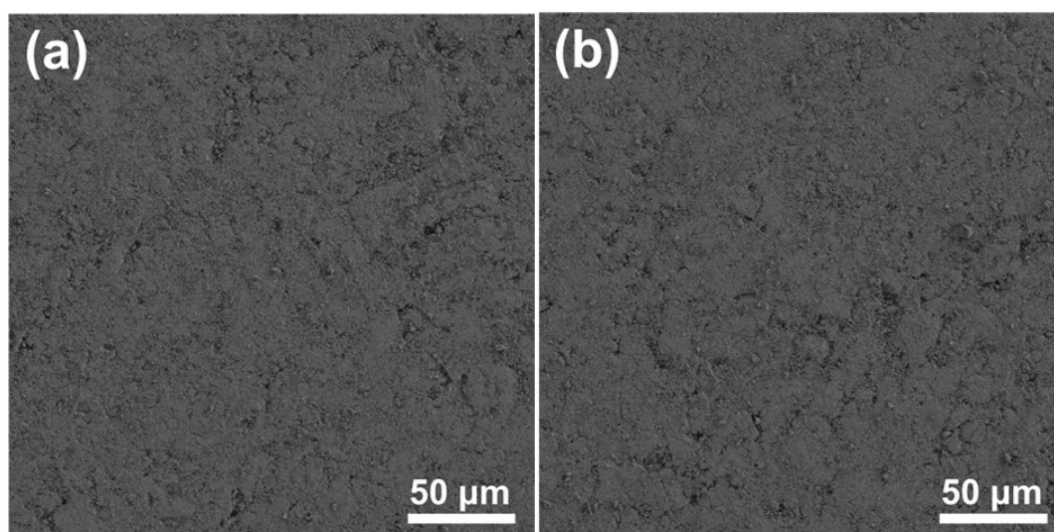

**Figure S21.** SEM images of the P, Ru-CeO<sub>2</sub> self-supporting electrode (a) before and (b) after durability test in 1 M KOH+1.5 M NaCl.



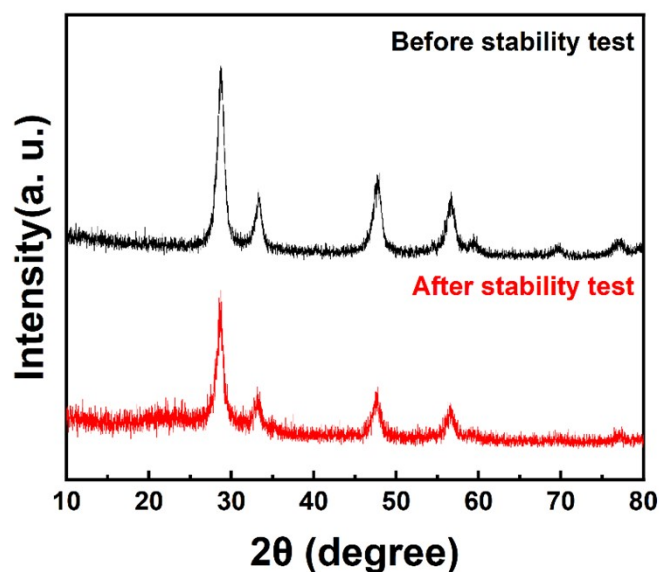

**Figure S22.** XRD pattern of the P, Ru-CeO<sub>2</sub> catalyst after durability test in 1 M KOH+1.5 M NaCl.

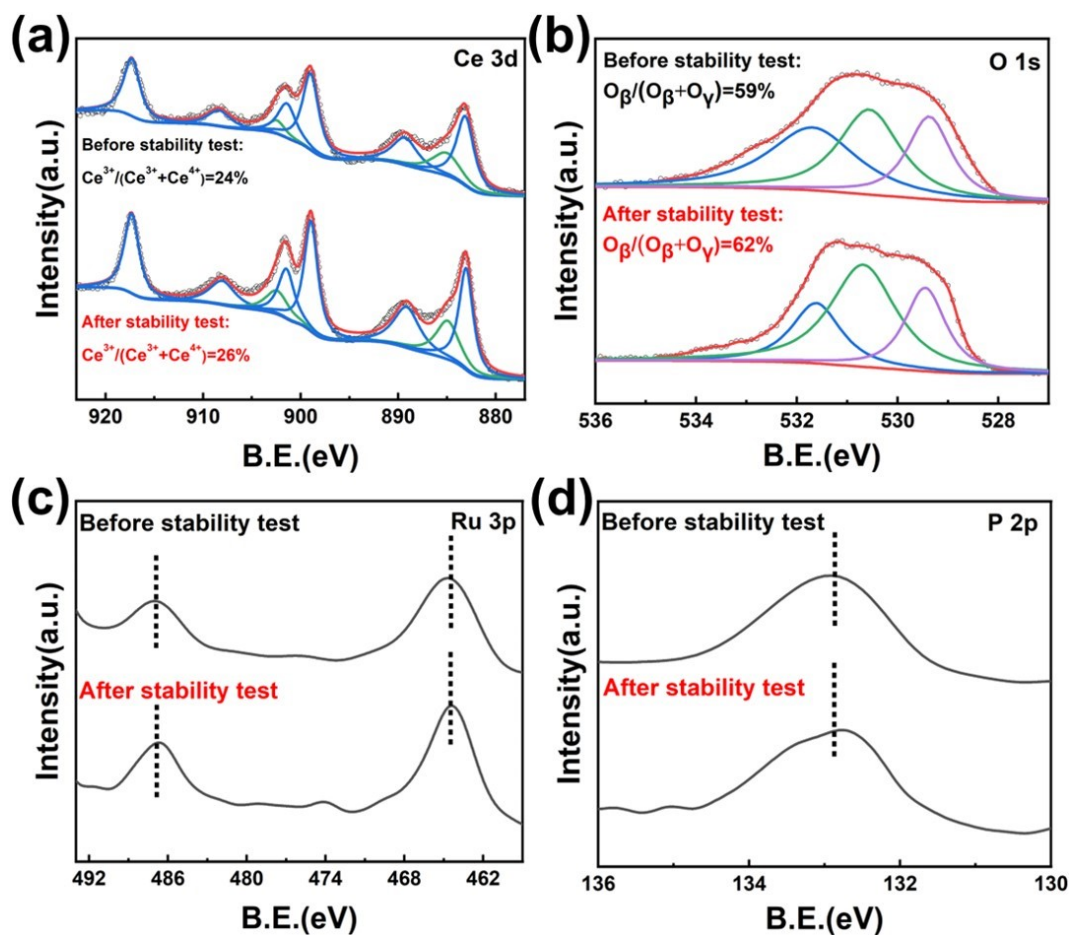

**Figure S23.** XPS of the P, Ru-CeO<sub>2</sub> catalyst after durability test in 1 M KOH+1.5 M NaCl. (a) Ce 3d. (b) O 1s. (c) Ru 3p. (d) P 2p.

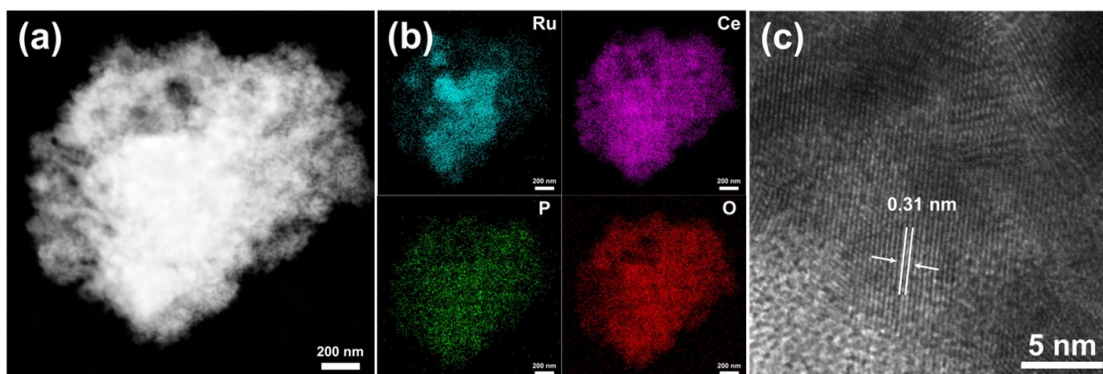

**Figure S24.** TEM images of the P, Ru-CeO<sub>2</sub> catalyst after durability test in 1 M KOH+1.5 M NaCl. (a) HADDF-STEM. (b) EDS. (c) HRTEM.

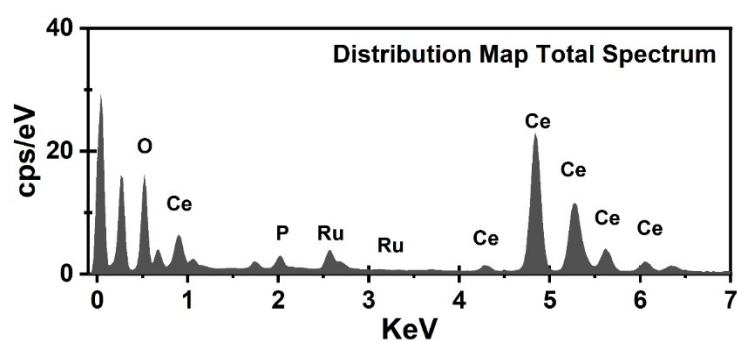

**Figure S25.** EDX spectrum of the P, Ru-CeO<sub>2</sub> catalyst, corresponding to **Figure S24**.

| Distribution Map Total Spectrum |           |         |          |
|---------------------------------|-----------|---------|----------|
| element                         | Line Type | Weight% | $\sigma$ |
| Ce                              | M         | 72.48   | 0.2      |
| O                               | K         | 17.57   | 0.1      |
| Ru                              | L         | 6.12    | 0.2      |
| P                               | K         | 1.61    | 0.1      |
| Other                           | -         | 2.22    | -        |
| <b>total</b>                    | —         | 100     | —        |

**Table S3.** Relative proportions of main elements, corresponding to **Figure S25**.

## References

- 1 A. Kong, M. Peng, M. Liu, Y. Lv, H. Zhang, Y. Gao, J. Liu, Y. Fu, W. Li and J. Zhang, *Applied Catalysis B-Environmental*, 2022, **316**, 121654.
- 2 H. Yi, X. Zhang, Z. Ai, S. Song and Q. An, *ChemSuSchem*, 2022, **15**, 2201532.

- 3 Q. Zhou, C. Xu, J. Hou, W. Ma, T. Jian, S. Yan and H. Liu, *Nano-Micro Letters*, 2023, **15**, 95.
- 4 D. Wu, D. Chen, J. Zhu and S. Mu, *Small*, 2021, **17**, 2102777.
- 5 Z. Dan, W. Liang, X. Gong, X. Lin, W. Zhang, Z. Le, F. Xie, J. Chen, M. Yang, N. Wang, Y. Jin and H. Meng, *ACS Materials Letters*, 2022, **4**, 1374-1380.
- 6 Y. Zhang, K. E. Arpino, Q. Yang, N. Kikugawa, D. A. Sokolov, C. W. Hicks, J. Liu, C. Felser and G. Li, *Nature Communications*, 2022, **13**, 7784.
- 7 P. Zhao, C. Peng, Q. Zhang, X. Fan, H. Chen, Y. Zhu and Y. Min, *Chemical Engineering Journal*, 2023, **461**, 142037.
- 8 X. Chen, X. Zhao, Y. Wang, S. Wang, Y. Shang, J. Xu, F. Guo and Y. Zhang, *ChemCatChem*, 2021, **13**, 3619-3627.
- 9 Y. Tan, R. Xie, S. Zhao, X. Lu, L. Liu, F. Zhao, C. Li, H. Jiang, G. Chai, D. J. L. Brett, P. R. Shearing, G. He and I. P. Parkin, *Advanced Functional Materials*, 2021, **31**, 2105579.
- 10 C. Chai, J. Yang, C. Jiang, L. Liu and J. Xi, *Acs Applied Energy Materials*, 2022, **5**, 2909-2917.
